# Supplementary material
Source: PubMed Central journal article supplement (PMC3713131)
Supplement: cc-12-1722-s01.pdf [file cc-12-1722-s01.pdf]

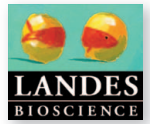

## **Supplemental Material to:**

**Sue Haupt, Catherine Mitchell, Vincent Corneille, Jake Shortt, Stephen Fox, Pier Paolo Pandolfi, Mireia Castillo-Martin, Dennis M. Bonal, Carlos Cordon-Carlo, Guillermina Lozano and Ygal Haupt**

**Loss of PML cooperates with mutant p53 to drive more aggressive cancers in a gender-dependent manner**

**2013; 12(11)**

**<http://dx.doi.org/10.4161/cc.24805>**

**<http://www.landesbioscience.com/journals/cc/article/24805>**

# Supplementary Figure 1

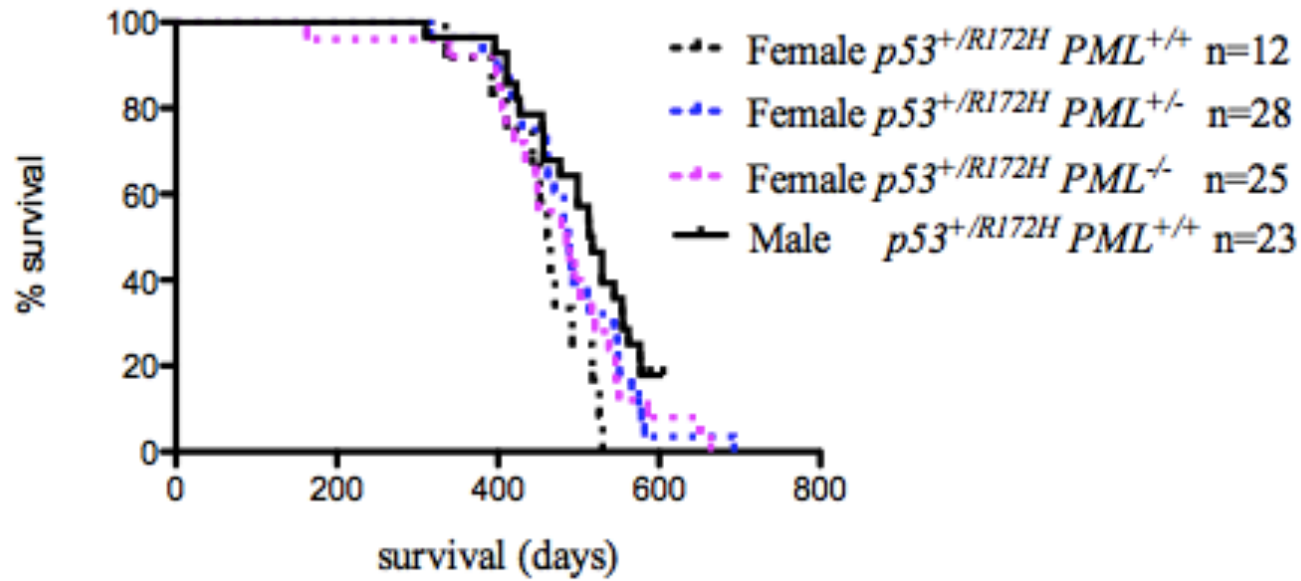

|                 | Female<br>$p53^{+/R172H}$<br>$PML^{+/+}$ | Female<br>$p53^{+/R172H}$<br>$PML^{+/-}$ | Female<br>$p53^{+/R172H}$<br>$PML^{-/-}$ | Male<br>$p53^{+/R172H}$<br>$PML^{+/+}$ |
|-----------------|------------------------------------------|------------------------------------------|------------------------------------------|----------------------------------------|
| Median survival | 463d*                                    | 488d*                                    | 485d*                                    | 515d*                                  |
| No. Mice        | 12                                       | 28                                       | 25                                       | 23                                     |

\*Curves No Sig Diff by Mantel Cox Test  $p=0.0609$

## Supplementary Figure 2

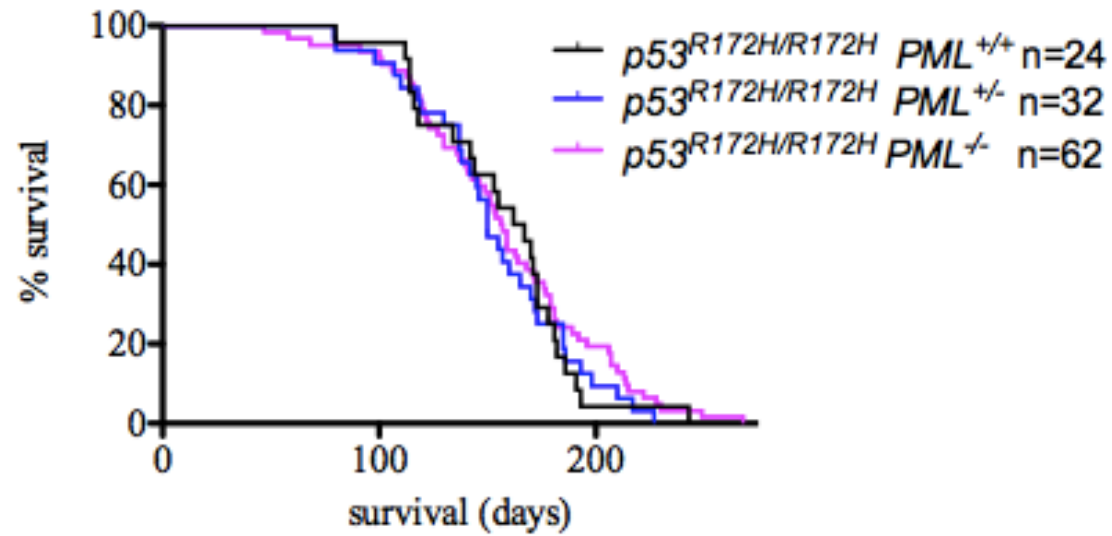

| <b>Males</b>           | $p53^{R172H/R172H}$<br>$PML^{+/+}$ | $p53^{R172H/R172H}$<br>$PML^{+/-}$ | $p53^{R172H/R172H}$<br>$PML^{-/-}$ |
|------------------------|------------------------------------|------------------------------------|------------------------------------|
| <b>Median survival</b> | 164.5d                             | 150d                               | 156.5d                             |
| <b>No. Mice</b>        | 24                                 | 32                                 | 62                                 |

\*Curves No Sig Diff by Mantel Cox Test  $p=0.6136$



Supplementary Figure 3

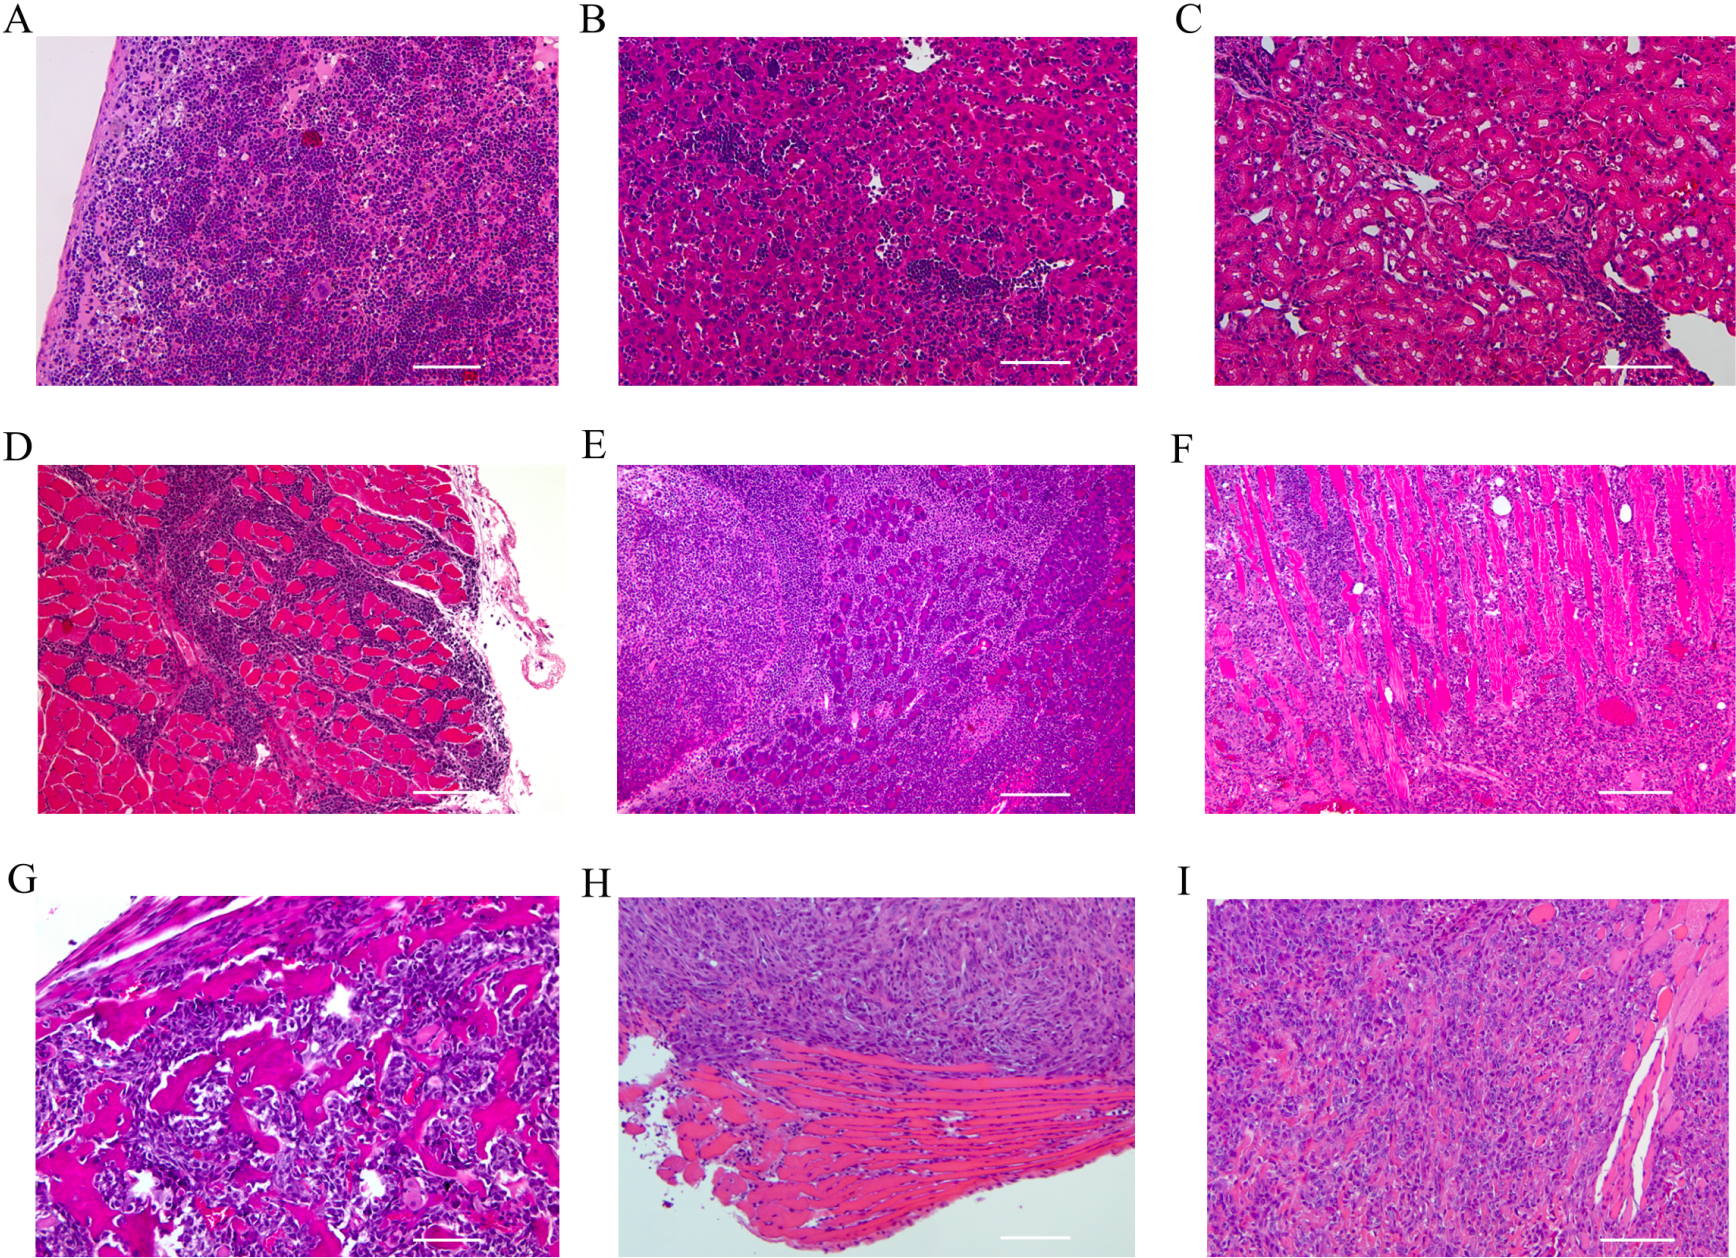



## Supplementary Figure 4

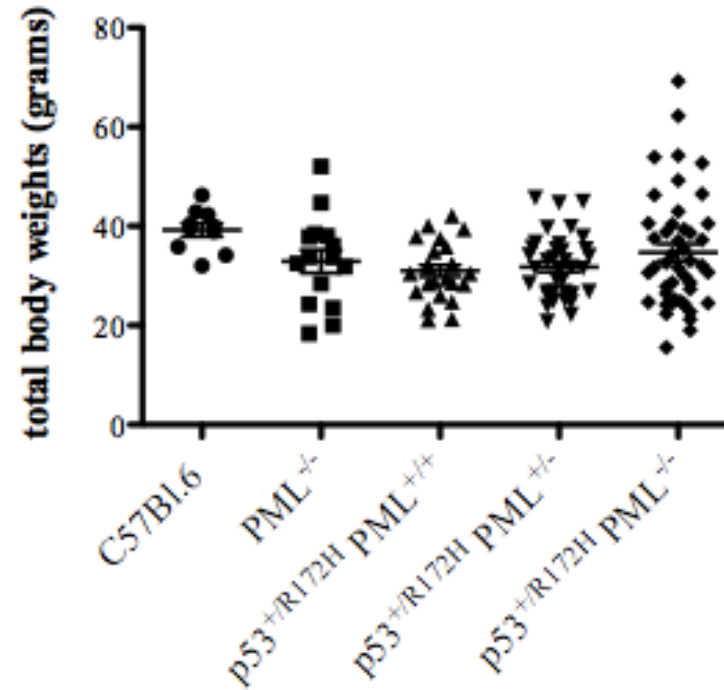

|                                     | <b>C57BL.6</b> | <i>PML</i> <sup>-/-</sup> | <i>p53</i> <sup>+/R172H</sup><br><i>PML</i> <sup>+/+</sup> | <i>p53</i> <sup>+/R172H</sup><br><i>PML</i> <sup>+/-</sup> | <i>p53</i> <sup>+/R172H</sup><br><i>PML</i> <sup>-/-</sup> |
|-------------------------------------|----------------|---------------------------|------------------------------------------------------------|------------------------------------------------------------|------------------------------------------------------------|
| <b>*mean body weight</b>            | 39.24          | 32.90                     | <b>31.00</b>                                               | <b>31.79</b>                                               | 34.70                                                      |
| <b>*p-value relative to C57BL.6</b> |                | ns 0.0521                 | s 0.0003                                                   | s 0.0011                                                   | ns 0.2296                                                  |
| <b>no. mice</b>                     | 10             | 15                        | 24                                                         | 37                                                         | 45                                                         |

\*significance (s) or no significance (ns) was determined using the unpaired t-test;  $p < 0.05$ , where all values were compared to C57BL.6

Supplementary Figure 5

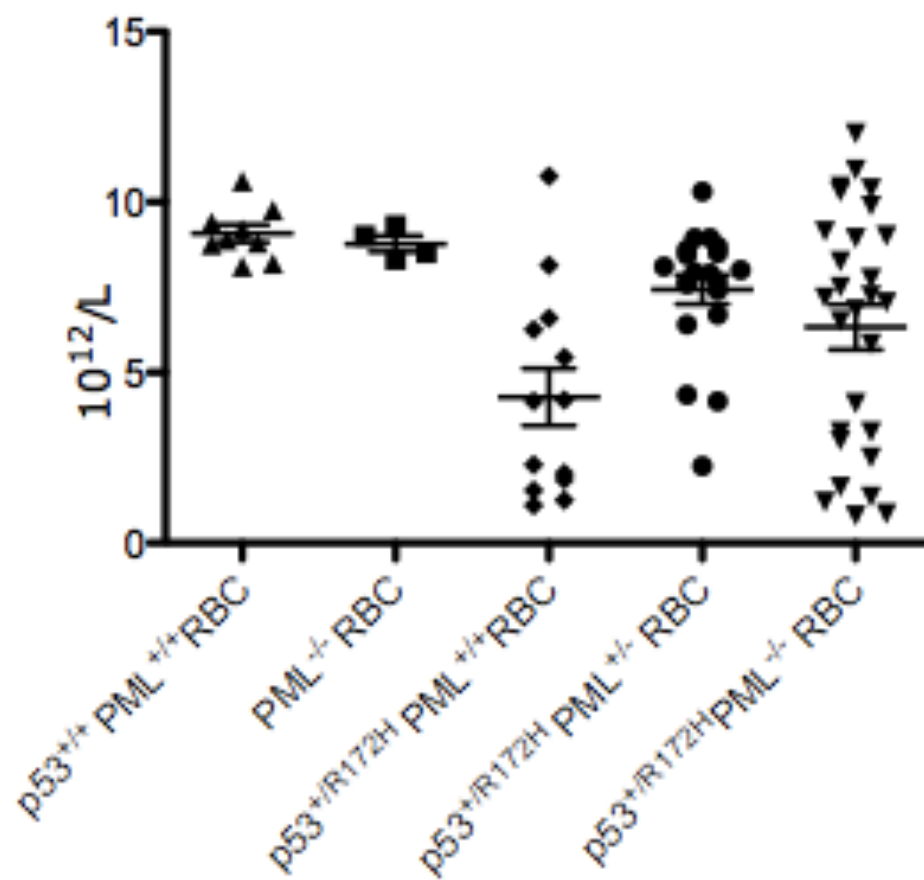





Supplementary Figure 7

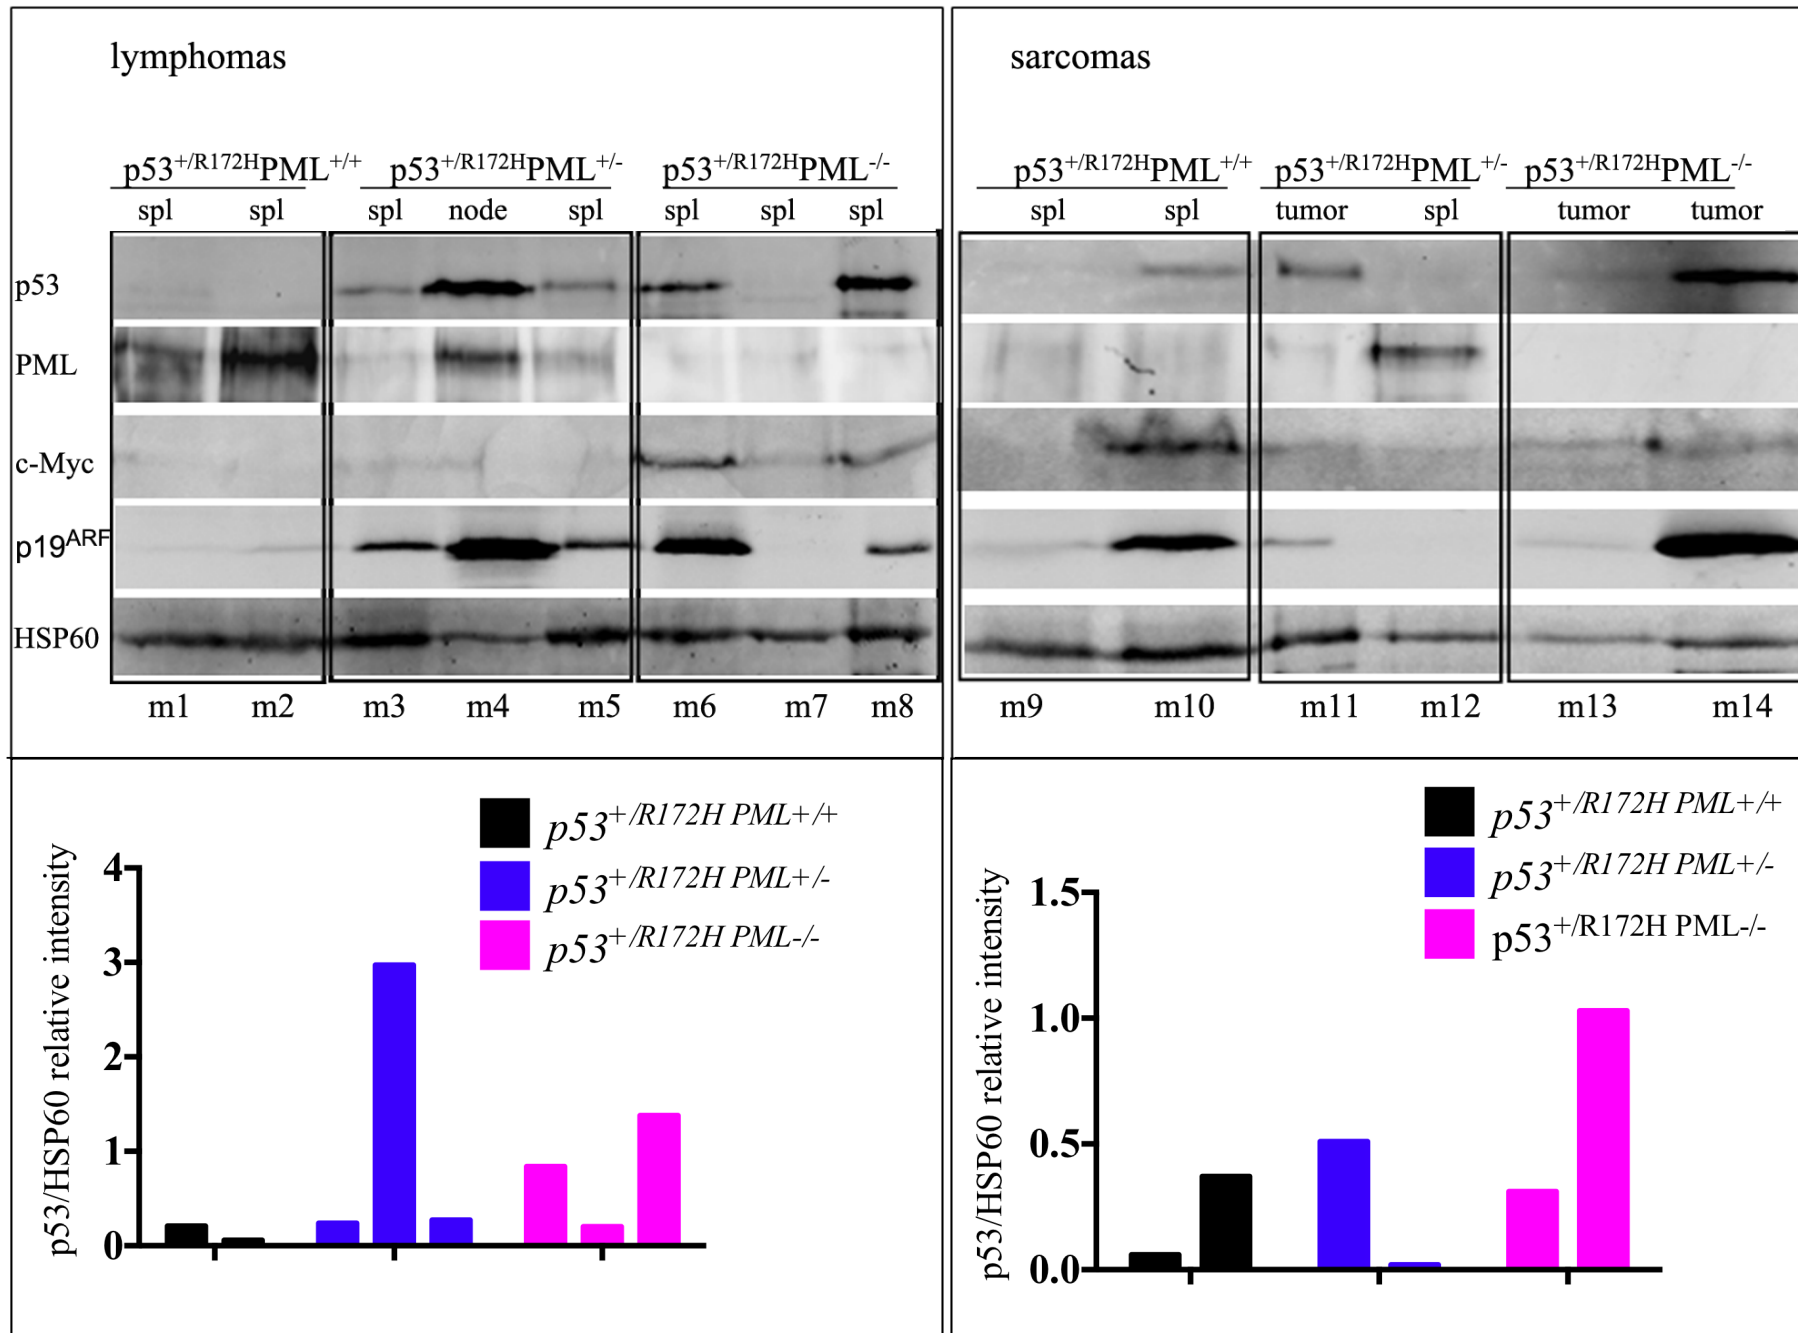

## Supplementary Table 1

Female survival is severely reduced in  $p53^{R172H/R172H}$  mice and this is not altered by PML loss

|            | $p53^{+/+} PML^{+/+}$ | $p53^{+/+} PML^{+/-}$ | $p53^{+/+} PML^{-/-}$ |
|------------|-----------------------|-----------------------|-----------------------|
| <b>XX</b>  | 27 (47%)              | 61 (42%)              | 139 (46%)             |
| <b>XY</b>  | 30 (53%)              | 83 (58%)              | 163 (54%)             |
| <b>SUM</b> | 57                    | 144                   | 302                   |

|            | $p53^{+/R172H} PML^{+/+}$ | $p53^{+/R172H} PML^{+/-}$ | $p53^{+/R172H} PML^{-/-}$ |
|------------|---------------------------|---------------------------|---------------------------|
| <b>XX</b>  | 173 (46%)                 | 81 (42%)                  | 102 (43%)                 |
| <b>XY</b>  | 206 (54%)                 | 112 (54%)                 | 135 (57%)                 |
| <b>SUM</b> | 80                        | 193                       | 237                       |

|            | $p53^{R172H/R172H} PML^{+/+}$ | $p53^{R172H/R172H} PML^{+/-}$ | $p53^{R172H/R172H} PML^{-/-}$ |
|------------|-------------------------------|-------------------------------|-------------------------------|
| <b>XX</b>  | 9 (11%)                       | 6 (12%)                       | 7 (9%)                        |
| <b>XY</b>  | 71 (89%)                      | 45 (88%)                      | 74 (91%)                      |
| <b>SUM</b> | 80                            | 51                            | 81                            |

## Supplementary Table 2A

Splenomegaly is evident in  $p53^{+/R172H}$  mice

|                                                    | <b>C57BL.6</b> | <b><i>PML</i><sup>-/-</sup></b> | <b><i>p53</i><sup>+/R172H</sup><br/><i>PML</i><sup>+/+</sup></b> | <b><i>p53</i><sup>+/R172H</sup><br/><i>PML</i><sup>+/-</sup></b> | <b><i>p53</i><sup>+/R172H</sup><br/><i>PML</i><sup>-/-</sup></b> |
|----------------------------------------------------|----------------|---------------------------------|------------------------------------------------------------------|------------------------------------------------------------------|------------------------------------------------------------------|
| <b>*Mean spleen weight<br/>(% of body weight )</b> | 0.2107         | 0.4089                          | <b>4.516</b>                                                     | 1.858                                                            | 1.362                                                            |
| <b>Fold change relative<br/>to control C57BL.6</b> | 1              | 2                               | <b>21</b>                                                        | 9                                                                | 6.5                                                              |
| <b>*p-value relative to<br/>C57BL.6</b>            |                | s 0.0031                        | s 0.0003                                                         | ns 0.0765                                                        | s 0.0241                                                         |
| <b>no. mice</b>                                    | 10             | 16                              | 22                                                               | 37                                                               | 45                                                               |

## Supplementary Table 2B

Hepatomegaly is evident in  $p53^{+/R172H}$  mice

|                                                    | <b>C57BL.6</b> | <b><i>PML</i><sup>-/-</sup></b> | <b><i>p53</i><sup>+/R172H</sup><br/><i>PML</i><sup>+/+</sup></b> | <b><i>p53</i><sup>+/R172H</sup><br/><i>PML</i><sup>+/-</sup></b> | <b><i>p53</i><sup>+/R172H</sup><br/><i>PML</i><sup>-/-</sup></b> |
|----------------------------------------------------|----------------|---------------------------------|------------------------------------------------------------------|------------------------------------------------------------------|------------------------------------------------------------------|
| <b>*mean liver weight<br/>(% of body weight )</b>  | 4.791          | 5.270                           | <b>11.07</b>                                                     | 7.117                                                            | 6.188                                                            |
| <b>fold change relative to<br/>control C57BL.6</b> | 1              | 1                               | <b>2</b>                                                         | 1.5                                                              | 1                                                                |
| <b>*p-value relative to<br/>C57BL.6</b>            |                | ns 0.3146                       | s 0.0131                                                         | ns 0.2437                                                        | ns 0.2275                                                        |
| <b>no. mice</b>                                    | 6              | 14                              | 23                                                               | 36                                                               | 45                                                               |

\*significance (s) or no significance (ns) was determined using the unpaired t-test;  $p < 0.05$ , where all values were compared to C57Bl.6



## Supplementary Table 3

A sub-population of Leiomyosarcomas exhibited coincident  
PML depletion and p53 positivity

| <b>Tumor Type</b>               | <b>PML depletion<br/>% (cases/total)</b> | <b>p53 positivity<br/>% (cases/total)</b> |
|---------------------------------|------------------------------------------|-------------------------------------------|
| well differentiated liposarcoma | 50 (3/6)                                 | 0 (0/6)                                   |
| myxoid liposarcoma, low grade   | 0 (0/2)                                  | 0 (0/2)                                   |
| myxoid liposarcoma, high grade  | 0 (0/5)                                  | 0 (0/5)                                   |
| pleomorphic liposarcoma         | 100 (2/2)                                | 0 (0/2)                                   |
| dedifferentiated liposarcoma    | 13 (1/8)                                 | 13 (1/8)                                  |
| malignant fibrous histiocyteoma | 20 (2/10)                                | 0 (0/10)                                  |
| low grade fibromyxoid sarcoma   | 0 (0/3)                                  | 0 (0/3)                                   |
| <b>leiomyosarcoma</b>           | <b>75 (6/8)</b>                          | <b>25 (2/8)</b>                           |

## Supplementary Figure Legends

**S Figure 1.** Kaplan-Meier survival curves for female  $p53^{+/R172H}$  mice were little effected by *PML* depletion.

**S Figure 2.** Kaplan-Meier survival curves for  $p53^{R172H/R172H}$  mice were not reduced by *PML* depletion.

**S Figure 3.**  $p53^{+/R172H}$  mice presented with EMH in the spleen (A); liver (B) and kidney (C) as demonstrated for  $p53^{+/R172H}PML^{+/+}$  mice; and also in smooth muscle (D) as presented for a  $p53^{+/R172H}PML^{+/-}$  mouse. Lymphoma (E) and leiomyosarcoma (F) and osteosarcoma (G) were identified as shown for  $p53^{+/R172H}PML^{+/-}$  mice; and undifferentiated pleiomorphic sarcoma in skeletal muscle (H) and osteosarcoma (I), as demonstrated for  $p53^{+/R172H}PML^{-/-}$  mice. Note: while the pathology is shown for individual genotypes, Table 1 defines prevalence of these manifestations. Tissue sections were stained for hematoxylin and eosin and visualized using a BX-51 microscope (Olympus) fitted with a x25 objective lens and 100 $\mu$ M increments are marked. Pictures were acquired using SPOT Version 4.7 software (Diagnostic Instruments).

**S Figure 4.** Disease manifestation in  $p53^{+/R172H}$  mice. Significant loss of body weight was most pronounced in  $p53^{+/R172H}$  mice with *PML*.

**S. Figure 5.** Hematological disruption in  $p53^{+/R172H}$  mice was evidenced by reduced red blood cell counts in  $p53^{+/R172H}$  mice with *PML*.

**S. Figure 6.** Densitometric analysis of p53 levels normalized to HSP60 for the Western immunoblots in Figure 4: where a range of tissues from  $p53^{+/R172H}$  mice ( $p53^{+/R175H}PML^{+/+}$ ;  $p53^{+/R175H}PML^{+/-}$ ;  $p53^{+/R175H}PML^{-/-}$ ) diagnosed with lymphomas (left panel) and sarcomas (right panel) were stained for p53 and HSP60.

**S. Figure 7.** Western immunoblotting of a range of tissues (spleens (spl.), node, tumor) from  $p53^{+/R172H}$  mice (m 1-14) stained for p53, p19<sup>ARF</sup>, c-Myc and HSP60 diagnosed with lymphomas and sarcomas. Lymphomas from genotypes ( $p53^{+/R175H}PML^{+/+}$ ;  $p53^{+/R175H}PML^{+/-}$ ;  $p53^{+/R175H}PML^{-/-}$ ) are shown on a single blot (left panel), and sarcomas (right panel) on a second (with superimposed black boxes to assist visual alignment). Densitometric analysis of p53 levels normalized to HSP60 are displayed directly underneath the corresponding Western immunoblot.
